# Supplementary material for: Randomised prospective trial to assess the clinical utility of multianalyte assay panel with complement activation products for the diagnosis of SLE
Source: PubMed Central journal article supplement — Lupus Sci Med. 2019 Sep 19;6(1):e000349. doi: 10.1136/lupus-2019-000349 (PMC6762037; doi:10.1136/lupus-2019-000349), 2019-09-19
Supplement: lupus-2019-000349supp001.pdf [file lupus-2019-000349supp001.pdf]

## SUPPLEMENTARY MATERIALS

### A RANDOMIZED PROSPECTIVE TRIAL TO ASSESS THE CLINICAL UTILITY OF MULTIANALYTE ASSAY PANEL WITH COMPLEMENT ACTIVATION PRODUCTS IN THE DIAGNOSING OF SYSTEMIC LUPUS ERYTHEMATOSUS

Daniel Wallace<sup>1</sup>, Roberta Vezza Alexander<sup>2</sup>, Tyler O'Malley<sup>2</sup>, Arezou Khosroshahi<sup>3</sup>, Mehrnaz Hojjati<sup>4</sup>,  
Konstantinos Loupasakis<sup>5</sup>, Jeffrey Alper<sup>6</sup>, Yvonne Sherrer<sup>6</sup>, Maria Fondal<sup>6</sup>,  
Rajesh Kataria<sup>6</sup>, Tami Powell<sup>2</sup>, Claudia Ibarra<sup>2</sup>, Sonali Narain<sup>7</sup>,  
Elena Massarotti<sup>8</sup>, Arthur Weinstein<sup>2</sup> and Thierry Dervieux<sup>2</sup>

#### **Figure S1:** 2-tiered method

Two-tier diagnostic methodology. Samples are tier-1 positive if they are positive for anti-dsDNA (confirmed using *Critidia Luciliae*) or anti-Sm antibodies or have highly elevated EC4d or BC4d. The index score (tier 2) is calculated for tier-1 negative specimens. The ANA component (ANA comp) utilizes two thresholds and can have a value of 0 (ANA < 20 units), a value of 1 (20 ≤ ANA < 60 units) or a value of 2 (ANA ≥ 60 units). The CB-CAPs component corresponds to the sum of the log normalized EC4d and BC4d values. The antibody specificity component (Spec comp.) can have a value of 0 (ACPA, SSB, CENP, Jo-1, Scl-70 all negative) or 1 (either ACPA, SSB, CENP, Jo-1, or Scl-70 positive).

For example, a tier-1 negative subject presenting with ANA=35 units, EC4d =15 net MFI, BC4d=35 net MFI, and Anti-CCP=50 units would have an index score of:

$$\text{Tier-2 index} = -5.2954 + (0.9771 \times 1) + [0.3053 \times \ln(15) + 1.0278 \times \ln(35)] - (2.4819 \times 1) = -2.3$$

Ln: natural log

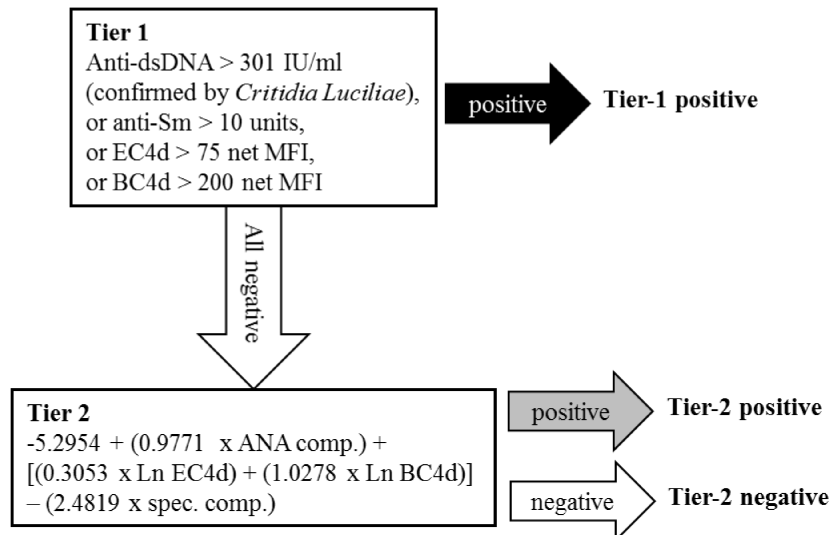

**Supplementary Figure 2: Enrollment in the study**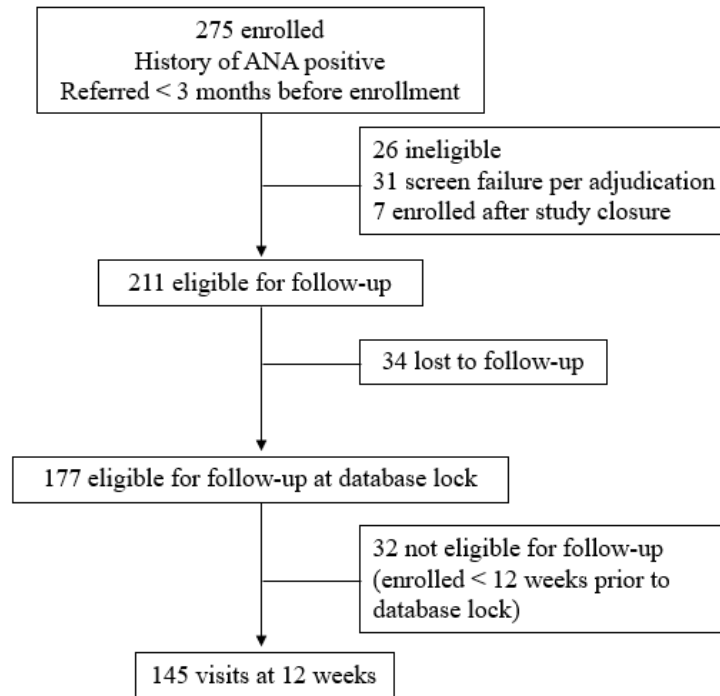

**Supplementary Table I: Symptoms at enrollment visit.**

There were no significant differences between the incidence of symptoms between SDLT and MAP testing arm ( $p>0.17$ ) with the exception of Raynaud's ( $p=0.03$ ).

| Symptoms,<br>Mild to severe | SDLT arm<br>N=73 | MAP/CB-CAPs<br>testing arm<br>N=72 |
|-----------------------------|------------------|------------------------------------|
| <b>Fever</b>                | 1.4% [1/73]      | 4.2% [3/72]                        |
| <b>Weight loss</b>          | 2.7% [2/73]      | 8.3% [6/72]                        |
| <b>Fatigue</b>              | 72.6% [53/73]    | 77.8% [56/72]                      |
| <b>Arthralgia</b>           | 83.6% [61/73]    | 80.6% [58/72]                      |
| <b>Arthritis</b>            | 56.2% [41/73]    | 56.9% [41/72]                      |
| <b>Muscle weakness</b>      | 12.3% [9/73]     | 15.3% [11/72]                      |
| <b>Myalgia</b>              | 38.4% [28/73]    | 43.1% [31/72]                      |
| <b>Generalized aches</b>    | 49.3% [36/73]    | 52.8% [38/72]                      |
| <b>Raynaud's</b>            | 16.4% [12/73]    | 31.9% [23/72]                      |
| <b>Sicca</b>                | 37.0% [27/73]    | 48.6% [35/72]                      |
| <b>Skin rash</b>            | 35.6% [26/73]    | 33.3% [24/72]                      |
| <b>Hair loss</b>            | 47.9% [35/73]    | 40.3% [29/72]                      |
| <b>Vasculitis</b>           | 0.0% [0/73]      | 0.0% [0/72]                        |
| <b>Neurological</b>         | 11.0% [8/73]     | 8.3% [6/72]                        |
| <b>Lung disease</b>         | 2.7% [2/73]      | 2.8% [2/72]                        |

**Supplementary Table II: Diagnostic immunology profile by randomization arm, as compared to estimates from the clinical laboratory.**

|                                                                                 | SDLT arm<br>[N=73] | MAP/CB-CAPs<br>arm [N=72] | Clinical<br>Laboratory<br>[N=283,754] |
|---------------------------------------------------------------------------------|--------------------|---------------------------|---------------------------------------|
| <b>ANA IFA <math>\geq</math>1:80</b>                                            | 79.5%              | 80.6%                     | 59.9%                                 |
| <b>ANA <math>\geq</math>20 units</b>                                            | 58.9%              | 61.1%                     | 54.1%                                 |
| <b>Anti-dsDNA [<math>&gt;</math>301 U], confirmed by IIF</b>                    | 1.4%               | 1.4%                      | 4.5%                                  |
| <b>Anti-Smith (<math>&gt;</math>10 U)</b>                                       | 1.4%               | 1.4%                      | 0.6%                                  |
| <b>EC4d (<math>&gt;</math>14 net MFI) or BC4d (<math>&gt;</math>60 net MFI)</b> | 12.3%              | 5.6%                      | 10.6%                                 |
| <b>Anti-CCP (<math>&gt;</math>10 U)</b>                                         | 1.4%               | 0.0%                      | 4.7%                                  |
| <b>Anti-CENP B (<math>&gt;</math>10 U)</b>                                      | 4.1%               | 1.4%                      | 3.1%                                  |
| <b>Anti-Jo1 (<math>&gt;</math>10 U)</b>                                         | 0.0%               | 0.0%                      | 0.2%                                  |
| <b>Anti-SSB (<math>&gt;</math>10 U)</b>                                         | 4.1%               | 2.8%                      | 2.6%                                  |
| <b>Anti-Scl 70 (<math>&gt;</math>10 U)</b>                                      | 0.0%               | 0.0%                      | 0.2%                                  |
| <b>MAP/CB-CAPs (<math>&gt;</math>0)</b>                                         | 15.1%              | 12.5%                     | 13.0%                                 |

**Supplementary Table III: Laboratory testing ordered in patients randomized to SDLT arm**

The results are expressed as the percentage of patients for whom specific markers were ordered

| Marker                  | percent patient<br>test ordered | Positive<br>%, N |
|-------------------------|---------------------------------|------------------|
| <b>Anti-dsDNA</b>       | 73% [53/73]                     | 6% [3/53]        |
| <b>Complement C3 C4</b> | 66% [48/73]                     | 6% [3/48]        |
| <b>Anti-SSB</b>         | 70% [51/73]                     | 6% [3/51]        |
| <b>Anti-Smith</b>       | 64% [47/73]                     | 2% [1/47]        |
| <b>Anti-Scl70</b>       | 55% [40/73]                     | 5% [2/40]        |
| <b>Anti-CCP</b>         | 47% [34/73]                     | 6% [2/34]        |
| <b>Anti-Jo-1</b>        | 36% [26/73]                     | 0% [0/26]        |
| <b>Anti-Centromere</b>  | 22% [16/73]                     | 13% [2/16]       |

**Supplementary Table IV: Change in SLE likelihood at 12 weeks among all patients (n=145), patients negative (n=125) and positive for MAP/CB-CAPs (n=20).**

Fisher Exact test [2x3] p values are provided. Clinicians were blinded to MAP/CB-CAPs test results in the group of subjects randomized to SDLT arm.

|                                             | SDLT arm    | MAP/CB-CAPs testing arm | Fisher Exact 3x2 |
|---------------------------------------------|-------------|-------------------------|------------------|
| <b>All patients</b>                         |             |                         |                  |
| Lower Likelihood (decrease $\geq 1$ point)  | 37% [27/73] | 56% [40/72]             | p=0.074          |
| Similar Likelihood (no change 0 point)      | 52% [38/73] | 39% [28/72]             |                  |
| Higher Likelihood (increase $\geq 1$ point) | 11% [8/73]  | 6% [4/72]               |                  |
| <b>Negative MAP/CB-CAPs results</b>         |             |                         |                  |
| Lower Likelihood (decrease $\geq 1$ point)  | 37% [23/62] | 60% [38/63]             | p=0.002          |
| Similar Likelihood (no change 0 point)      | 52% [32/62] | 40% [25/63]             |                  |
| Higher Likelihood (increase $\geq 1$ point) | 11% [7/62]  | 0% [0/63]               |                  |
| <b>Positive MAP/CB-CAPs results</b>         |             |                         |                  |
| Lower Likelihood (decrease $\geq 1$ point)  | 36% [4/11]  | 22% [2/9]               | p=0.274          |
| Similar Likelihood (no change 0 point)      | 55% [6/11]  | 33% [3/9]               |                  |
| Higher Likelihood (increase $\geq 1$ point) | 9% [1/11]   | 44% [4/9]               |                  |

**Supplementary Table V: Initiation of prednisone or HCQ in patients randomized to SDLT arm by positive vs negative marker status**

Initiation of prednisone or HCQ did not associate with any of the markers ( $p>0.13$ ).

| Marker                        | Prednisone Started     | HCQ Started               |
|-------------------------------|------------------------|---------------------------|
| Anti-dsDNA [pos vs neg]       | 0% [0/3] vs 12% [6/50] | 0% [0/3] vs 26% [13/50]   |
| Complement C3 C4 [pos vs neg] | 33% [1/3] vs 9% [4/45] | 33% [1/3] vs 22% [10/45]  |
| Anti-SSB [pos vs neg]         | 0% [0/3] vs 8% [4/48]  | 67% [2/3] vs 21% [10/48]  |
| Anti-Smith [pos vs neg]       | 0% [0/1] vs 9% [4/46]  | 100% [1/1] vs 24% [11/46] |
| Anti-CCP [pos vs neg]         | 0% [0/2] vs 13% [4/32] | 0% [0/2] vs 19% [6/32]    |
| Anti-CENP                     | 0% [0/2] vs 7% [1/14]  | 50% [1/2] vs 29% [4/14]   |

**Supplementary Table VI: Patient reported outcome [EQ-5D-5L] pre-test and post-test.**

Results are expressed as mean [SEM] at each study visit and change from enrollment.

|                                | Pre-test enrollment | Change 12-week |
|--------------------------------|---------------------|----------------|
| <b>SDLT arm</b>                |                     |                |
| All patients (n=47)            | 0.779±0.013         | -0.030±0.019   |
| MAP/CB-CAPs negative (n=39)    | 0.780±0.018         | -0.034±0.020   |
| MAP/CB-CAPs positive (n=8)     | 0.774±0.046         | -0.008±0.050   |
| <b>MAP/CB-CAPs testing arm</b> |                     |                |
| All patients (n=56)            | 0.779±0.012         | +0.004±0.018   |
| MAP/CB-CAPs negative (n=48)    | 0.775±0.144         | -0.011±0.018   |
| MAP/CB-CAPs positive (n=8)     | 0.805±0.096         | +0.099±0.046   |
